# Supplementary material for: First-principles investigation of lithium ion first-in-first-out behavior during delithiation and lithiation processes in Li 2 MnO 3 lithium-rich cathode materials
Source: Royal Society of Chemistry journal article supplement (doi:10.1039/d5cp01998b), 2025-12-10
Supplement: d5cp01998b1.pdf [file d5cp01998b1.pdf]

## Supplementary Information

### First-Principles Investigation of Lithium Ion First-In-First-Out Behavior during Delithiation and Lithiation Processes in $\text{Li}_2\text{MnO}_3$ Lithium-Rich Cathode Material

Yuyang Chen,\* Yuxin Wei, Yunsong Zhang and Rui Li

New Energy Storage Technology and Vocational Skills Innovation Research Center,  
Beijing Polytechnic College, Beijing 100042, China

Fig. S1 and Fig. S2 show the comparison of voltage curves and electronic structures of  $\text{Li}_2\text{MnO}_3$  based on the SCAN+rVV10 and PBE+D3 exchange–correlation functionals. The voltage profiles obtained using the SCAN+rVV10 and PBE+D3 exchange–correlation functionals show that SCAN+rVV10 predicts a lower initial delithiation voltage, which is also closer to the experimental value. In the later stages of delithiation, SCAN+rVV10 yields a slightly higher voltage window compared with PBE+D3. Overall, the higher-level SCAN+rVV10 functional produces a larger difference between the initial voltage and the voltage window, resulting in a description that agrees more closely with experimental observations and offers improved accuracy. The electronic-structure results show that both functionals exhibit consistent overall trends in the density of states of oxygen and manganese. However, the band gap calculated using SCAN+rVV10 is approximately 1.4 eV, whereas PBE+D3 yields a slightly smaller value of around 1.1 eV. Since the GGA-based PBE functional is known to underestimate band gaps, applying a +U correction can partially mitigate this deviation. In summary, the higher-level SCAN+rVV10 functional provides more accurate predictions of both the voltage profiles and electronic structure, while the PBE+D3 method with a +U correction offers a computationally more efficient approach that still provides reasonable and meaningful interpretations for the system studied in this work.

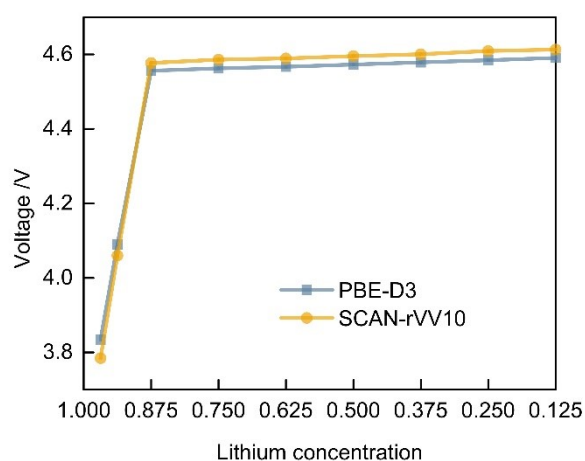

Fig. S1 Simulated voltage curves of  $\text{Li}_2\text{MnO}_3$  based on the SCAN+rVV10 and PBE+D3 pseudopotentials.

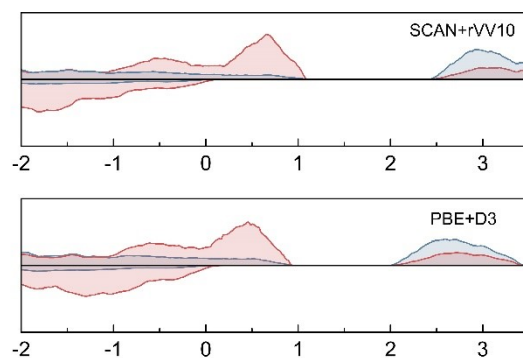

Fig. S2 Partial density of states of Mn and O from 75% lithium structure based on the SCAN+rVV10 and PBE+D3 pseudopotentials.

---

Fig. S3 to Fig. S32 show thirty computationally stable structures with different lithium contents and distributions. The CIF files obtained from VASP calculations are provided in the attachment.

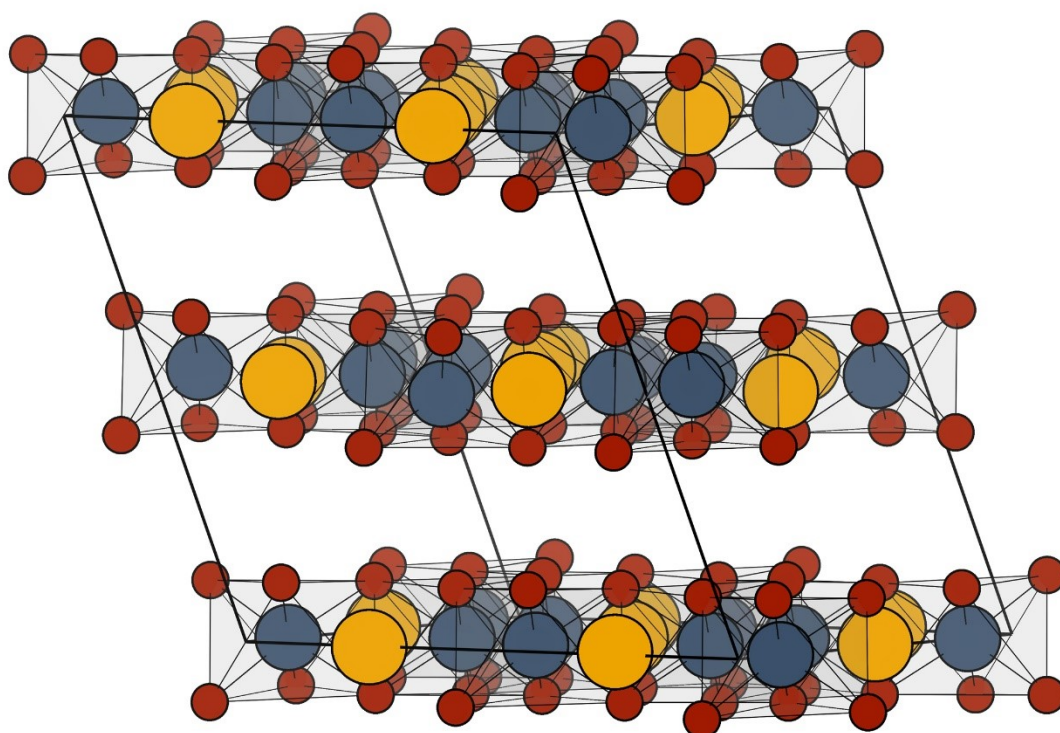

Fig S3 Calculated structure of  $\text{Li}_0(\text{Li-layer})\text{Li}_8(\text{Mn-layer})\text{Mn}_{16}\text{O}_{48}$

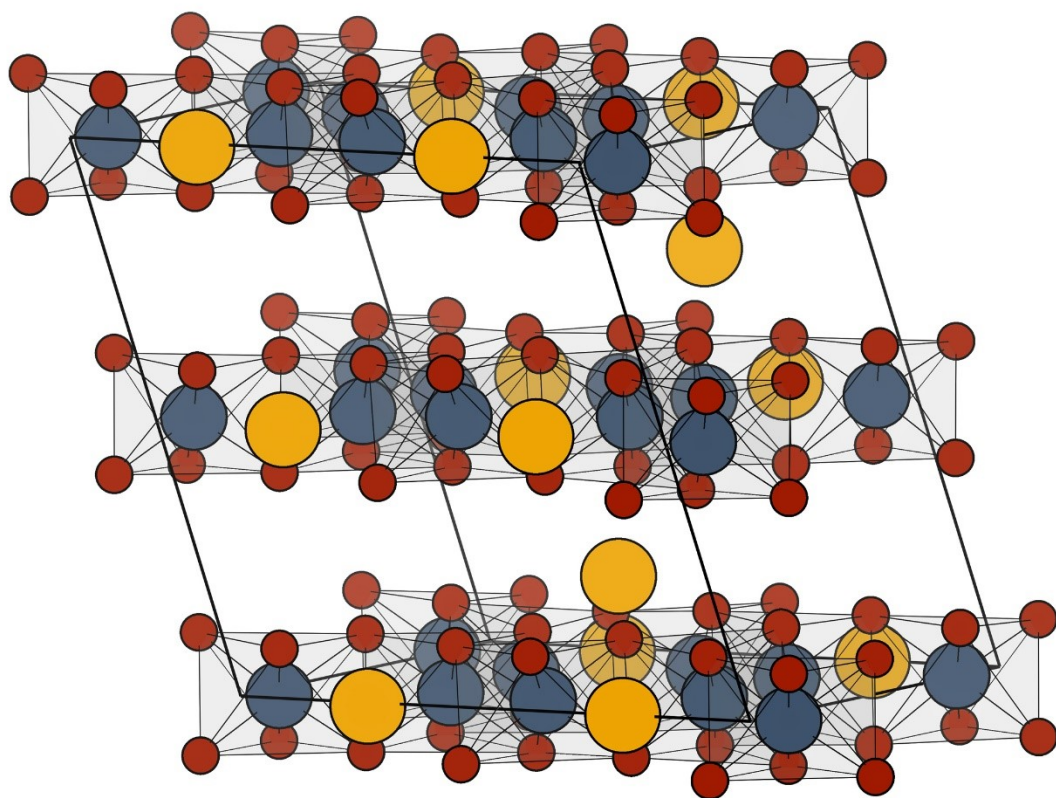

Fig S4 Calculated structure of  $\text{Li}_2(\text{Li-layer})\text{Li}_6(\text{Mn-layer})\text{Mn}_{16}\text{O}_{48}$



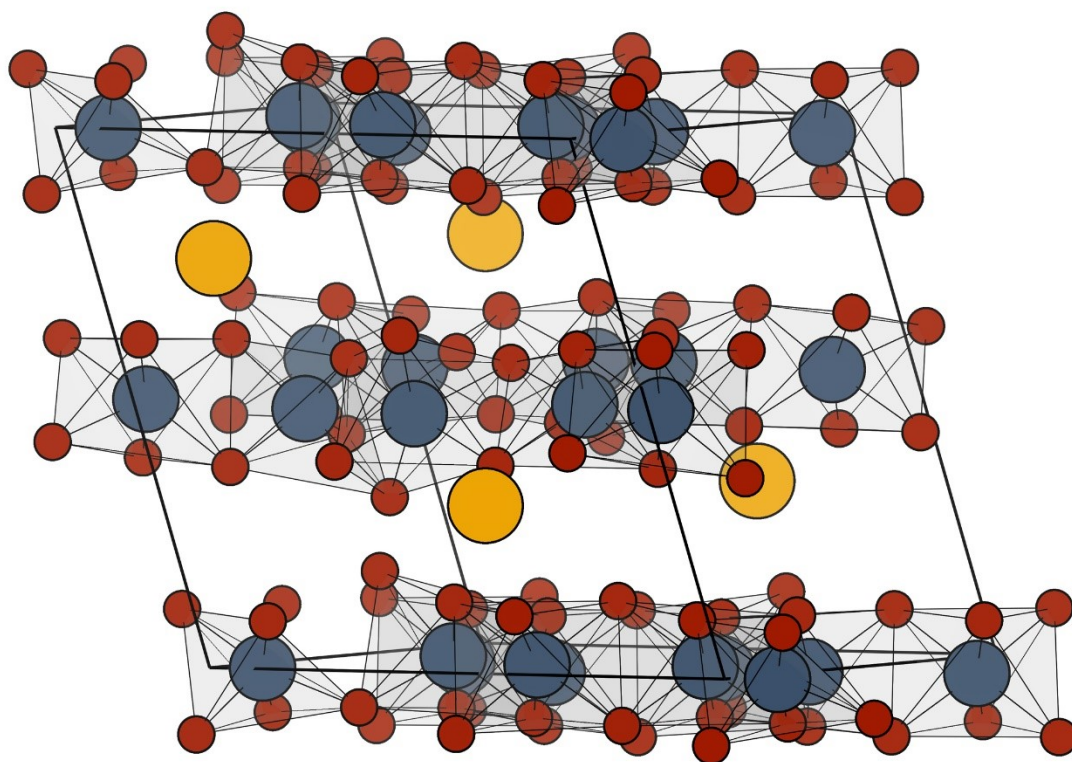

Fig S5 Calculated structure of  $\text{Li}_4(\text{Li-layer})\text{Li}_0(\text{Mn-layer})\text{Mn}_{16}\text{O}_{48}$

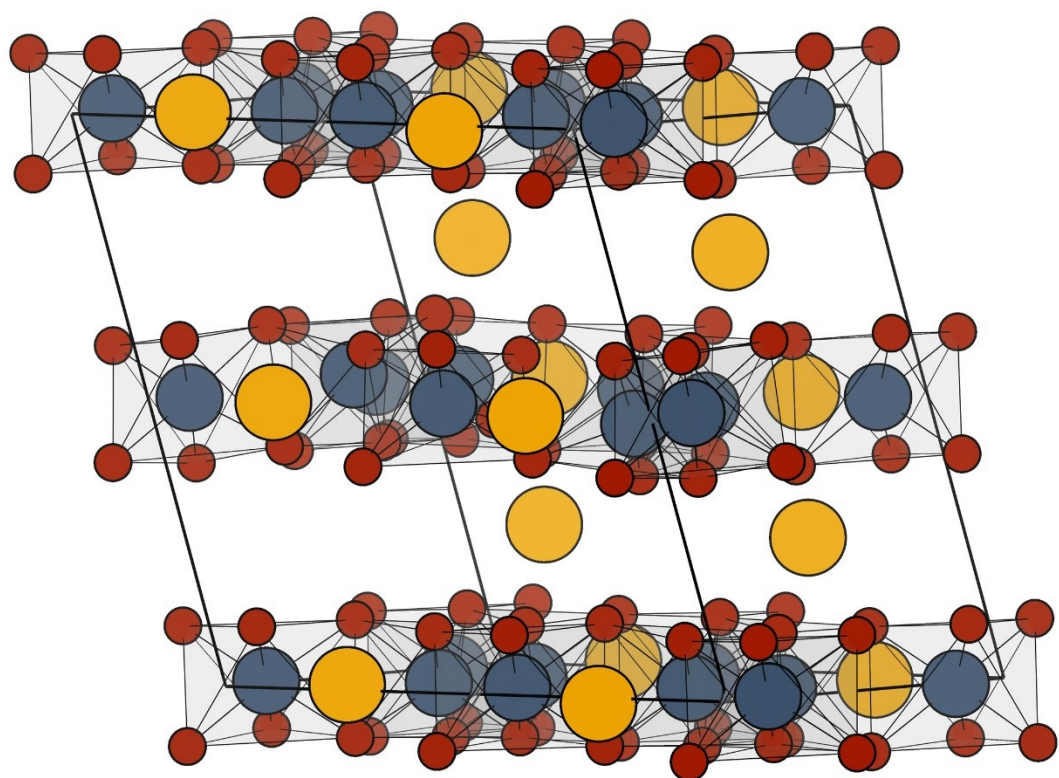

Fig S6 Calculated structure of  $\text{Li}_4(\text{Li-layer})\text{Li}_4(\text{Mn-layer})\text{Mn}_{16}\text{O}_{48}$

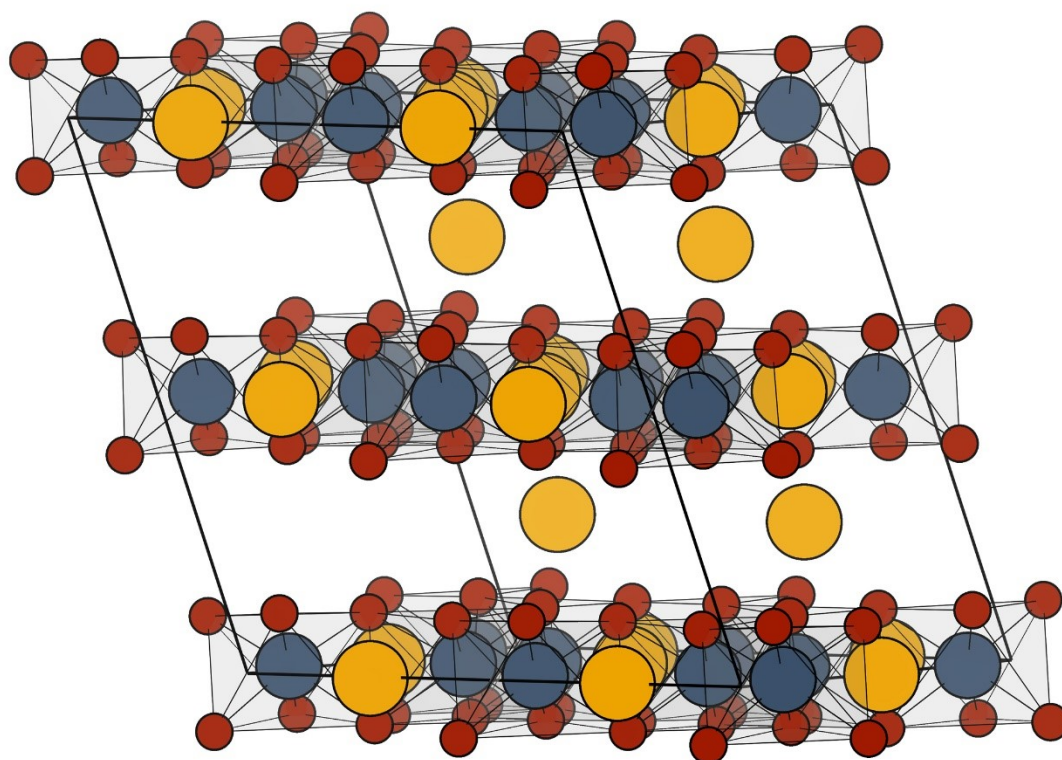

Fig S7 Calculated structure of  $\text{Li}_4(\text{Li-layer})\text{Li}_8(\text{Mn-layer})\text{Mn}_{16}\text{O}_{48}$

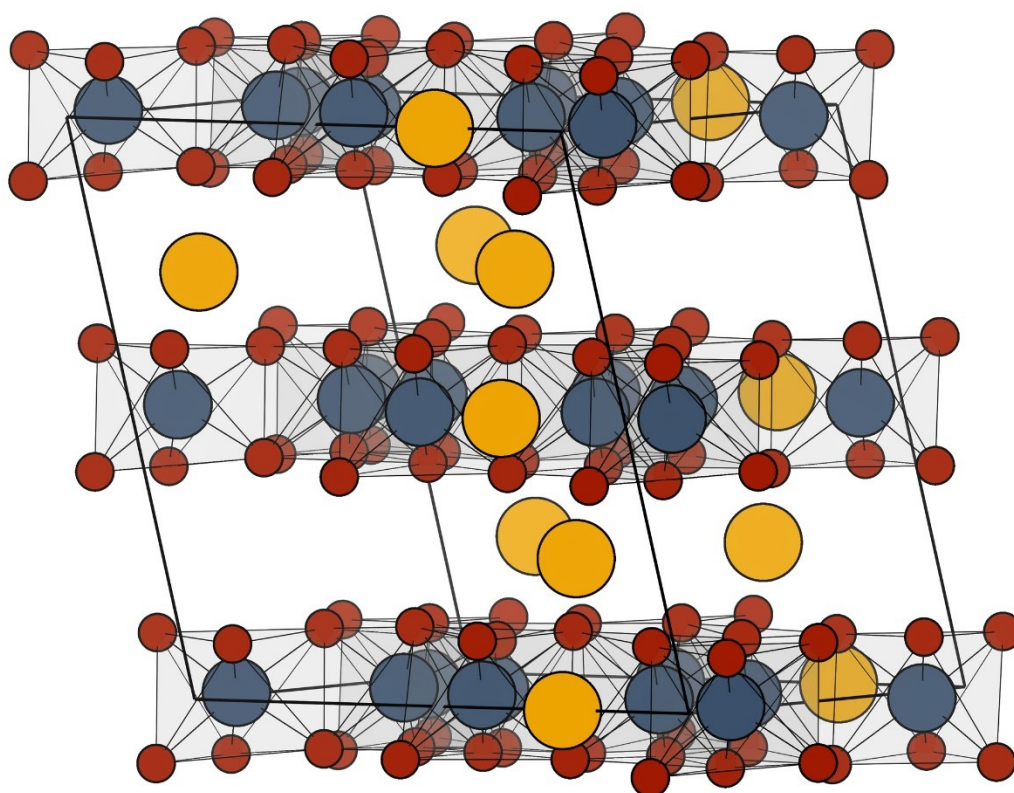

Fig S8 Calculated structure of  $\text{Li}_6(\text{Li-layer})\text{Li}_2(\text{Mn-layer})\text{Mn}_{16}\text{O}_{48}$

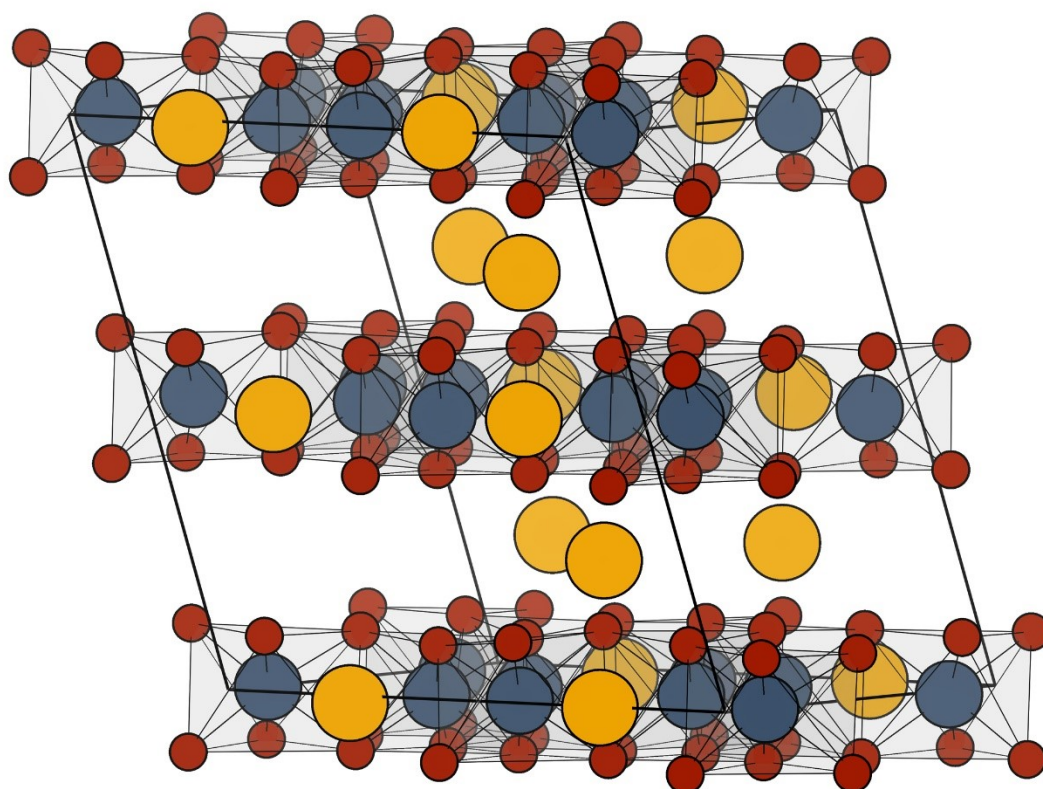

Fig S9 Calculated structure of  $\text{Li}_6(\text{Li-layer})\text{Li}_6(\text{Mn-layer})\text{Mn}_{16}\text{O}_{48}$



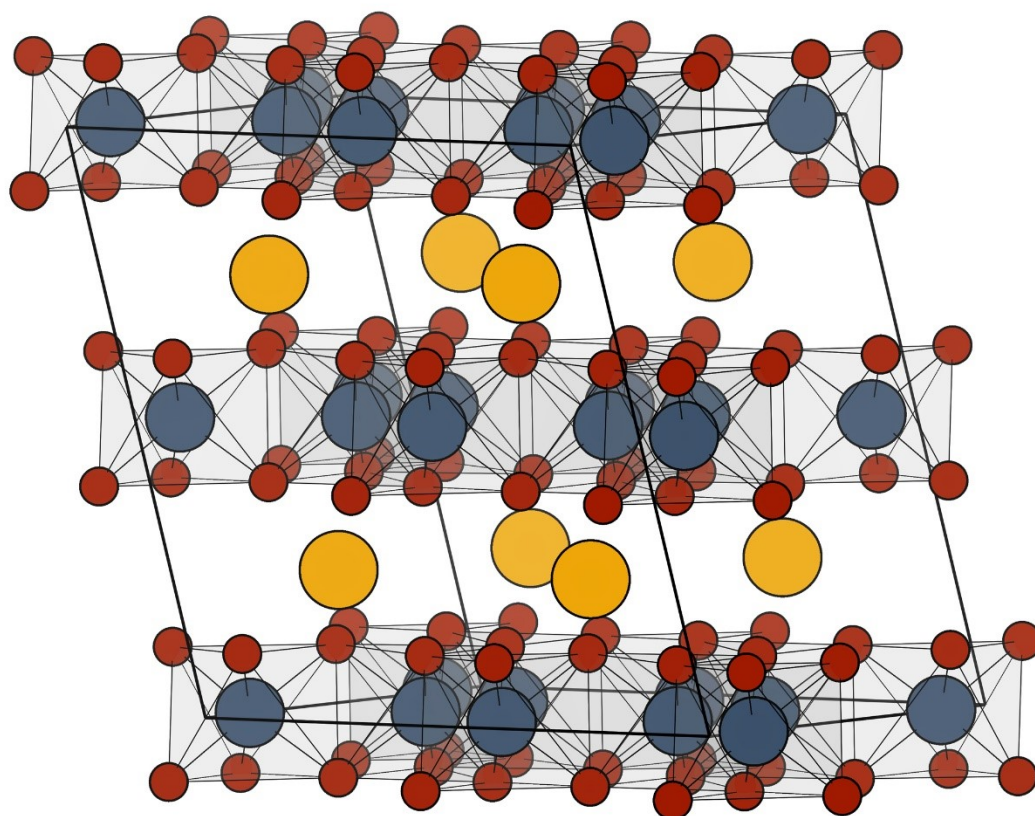

Fig S10 Calculated structure of  $\text{Li}_8(\text{Li-layer})\text{Li}_0(\text{Mn-layer})\text{Mn}_{16}\text{O}_{48}$

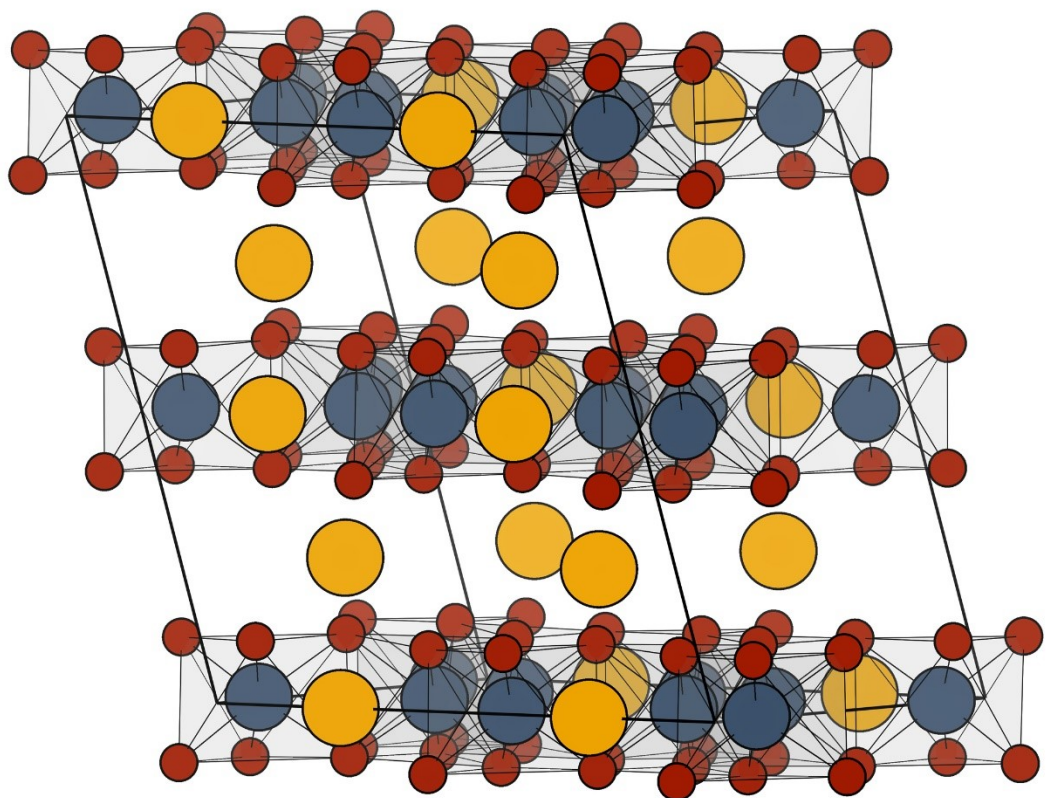

Fig S11 Calculated structure of  $\text{Li}_8(\text{Li-layer})\text{Li}_4(\text{Mn-layer})\text{Mn}_{16}\text{O}_{48}$



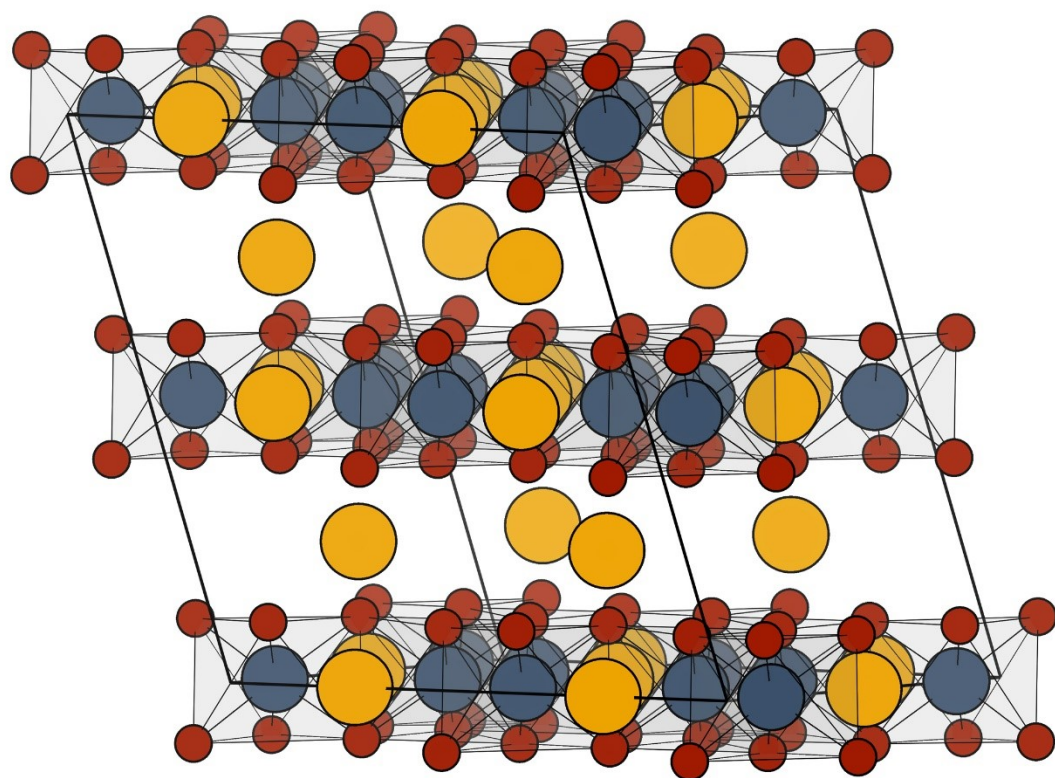

Fig S12 Calculated structure of  $\text{Li}_8(\text{Li-layer})\text{Li}_8(\text{Mn-layer})\text{Mn}_{16}\text{O}_{48}$

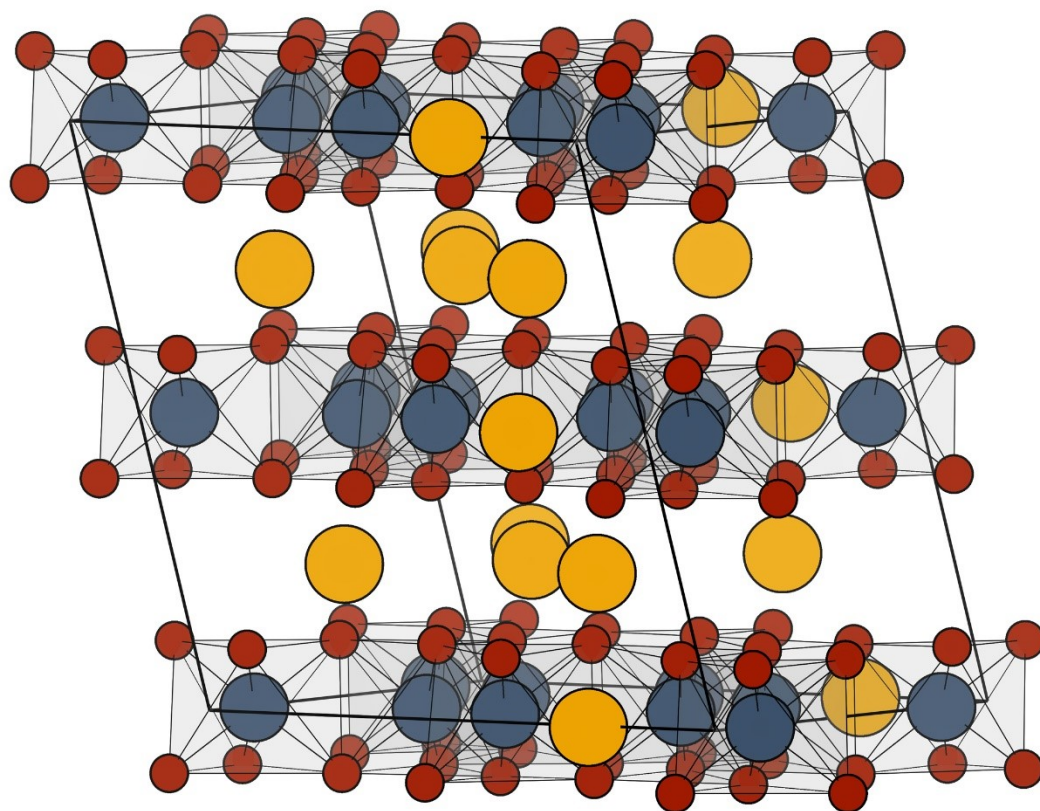

Fig S13 Calculated structure of  $\text{Li}_{10}(\text{Li-layer})\text{Li}_2(\text{Mn-layer})\text{Mn}_{16}\text{O}_{48}$

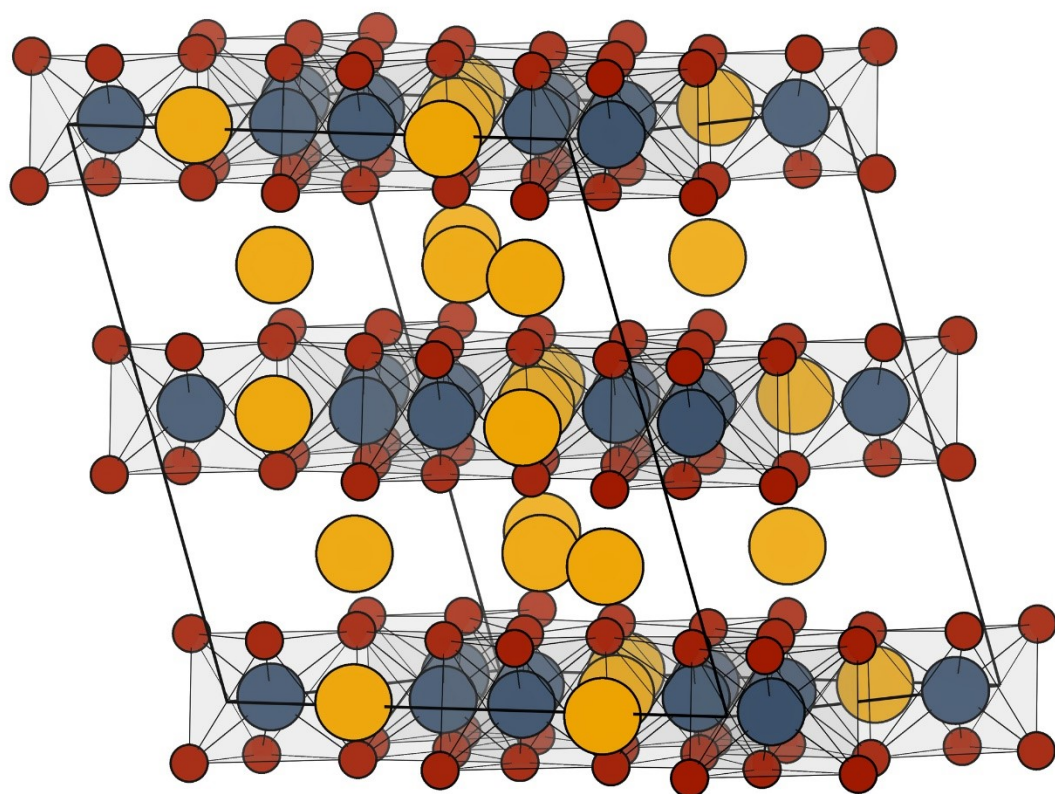

Fig S14 Calculated structure of  $\text{Li}_{10}(\text{Li-layer})\text{Li}_6(\text{Mn-layer})\text{Mn}_{16}\text{O}_{48}$

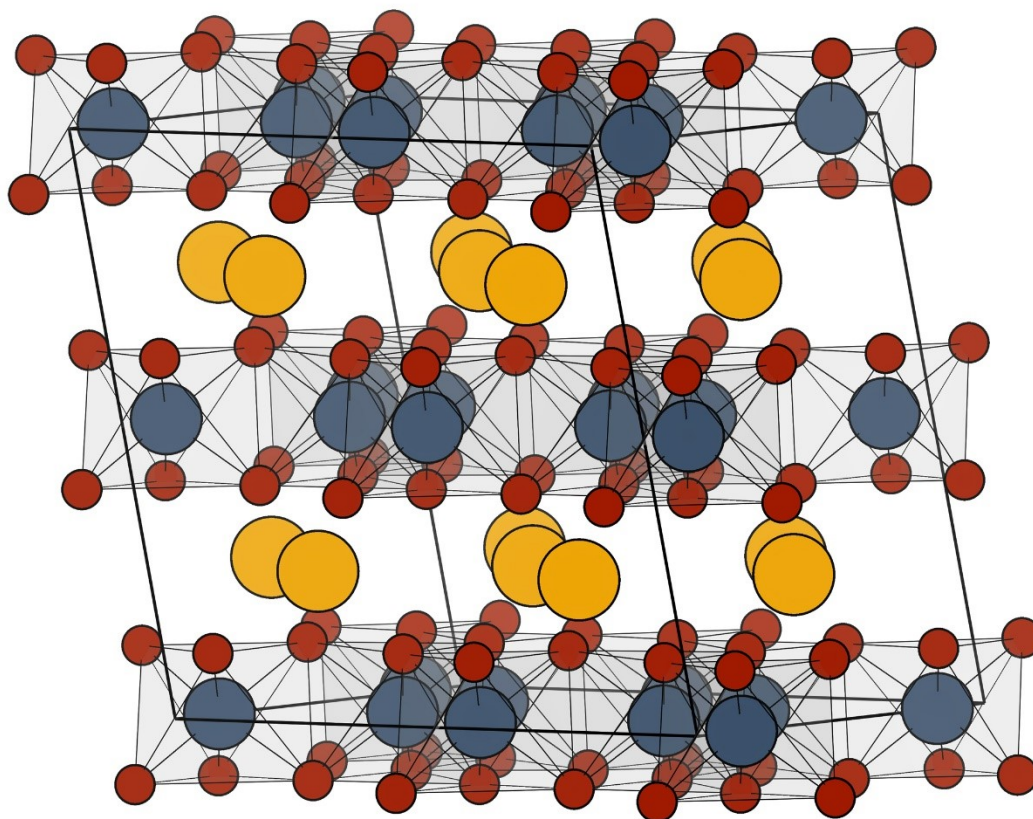

Fig S15 Calculated structure of  $\text{Li}_{12}(\text{Li-layer})\text{Li}_0(\text{Mn-layer})\text{Mn}_{16}\text{O}_{48}$



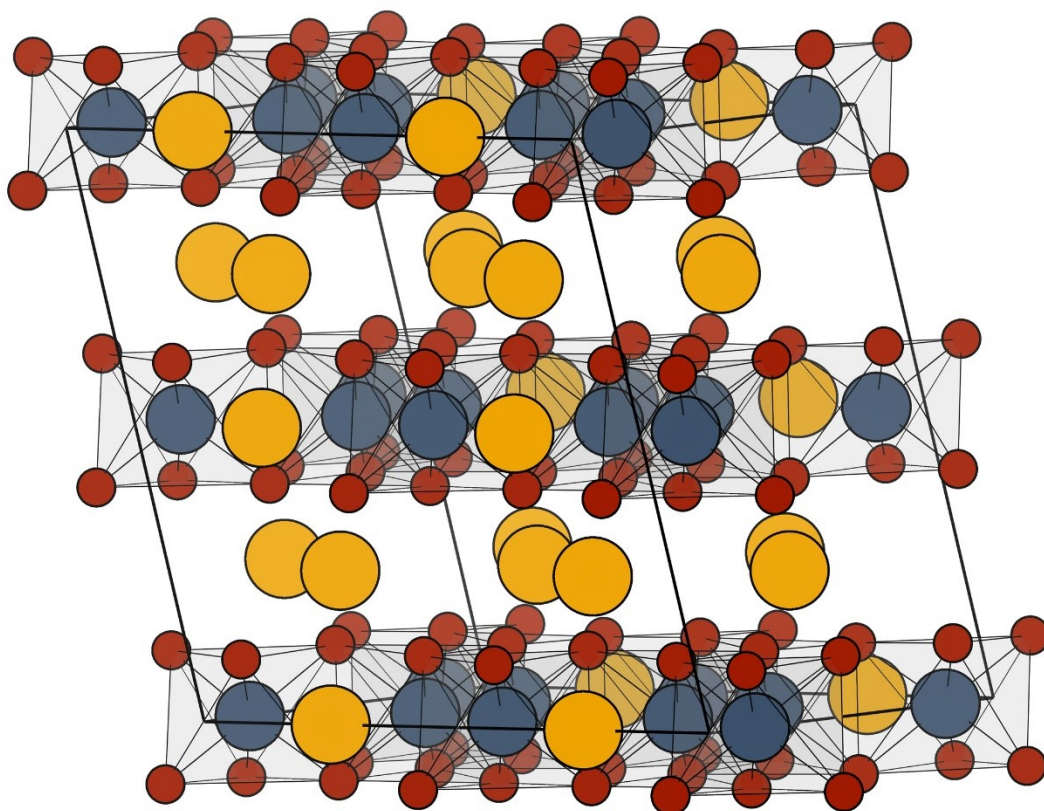

Fig S16 Calculated structure of  $\text{Li}_{12}(\text{Li-layer})\text{Li}_4(\text{Mn-layer})\text{Mn}_{16}\text{O}_{48}$

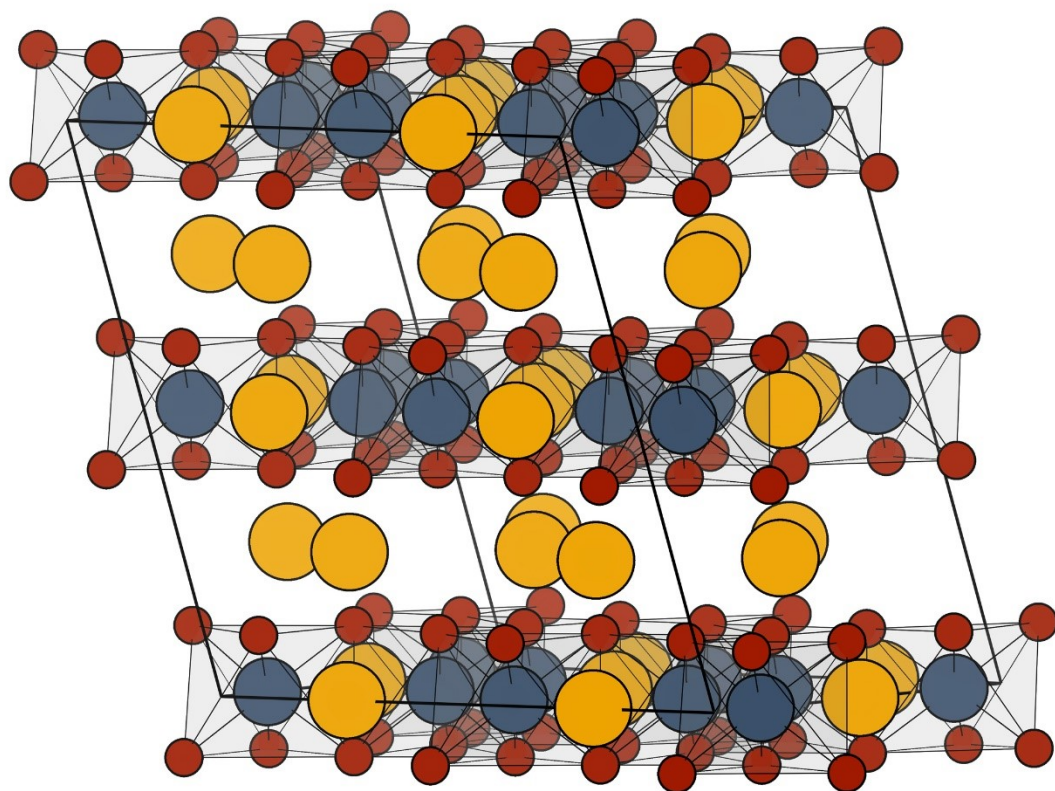

Fig S17 Calculated structure of  $\text{Li}_{12}(\text{Li-layer})\text{Li}_8(\text{Mn-layer})\text{Mn}_{16}\text{O}_{48}$

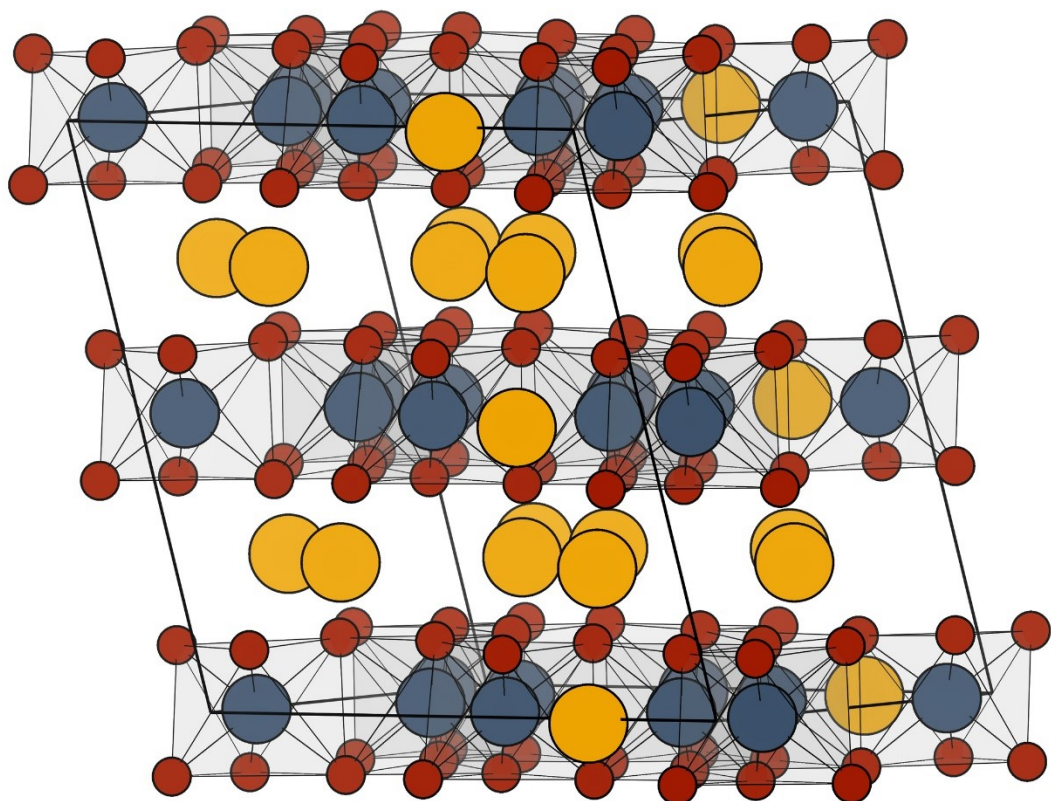

Fig S18 Calculated structure of  $\text{Li}_{14}(\text{Li-layer})\text{Li}_2(\text{Mn-layer})\text{Mn}_{16}\text{O}_{48}$



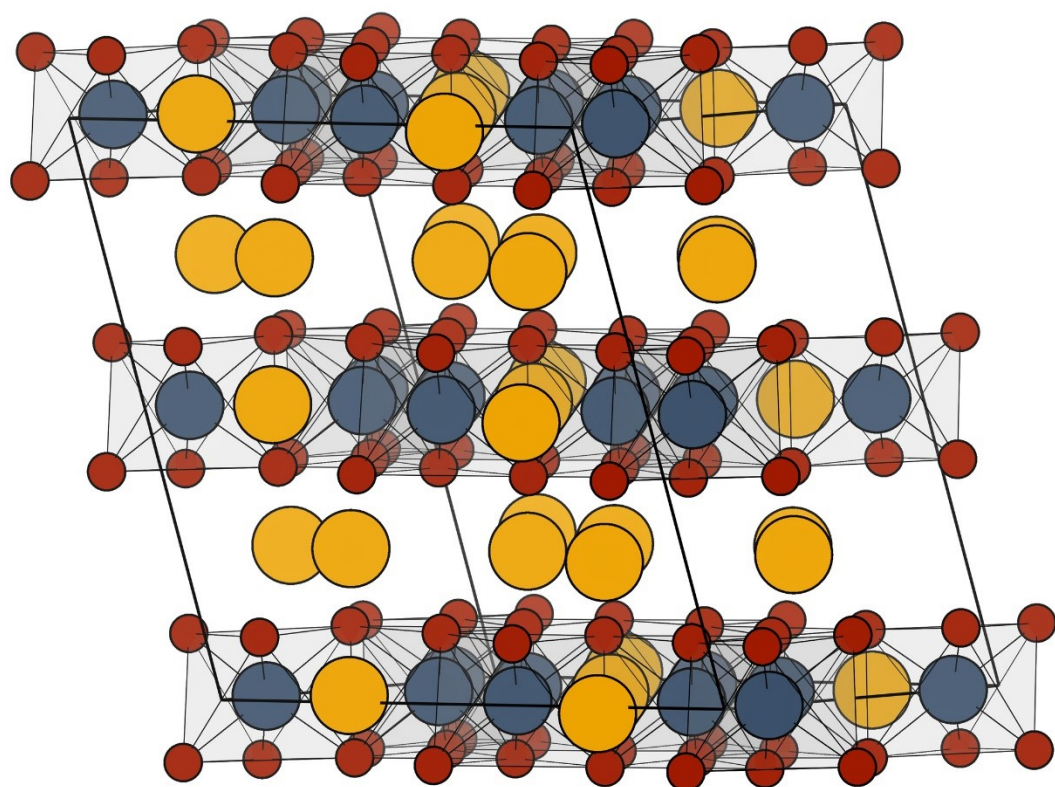

Fig S19 Calculated structure of  $\text{Li}_{14}(\text{Li-layer})\text{Li}_6(\text{Mn-layer})\text{Mn}_{16}\text{O}_{48}$

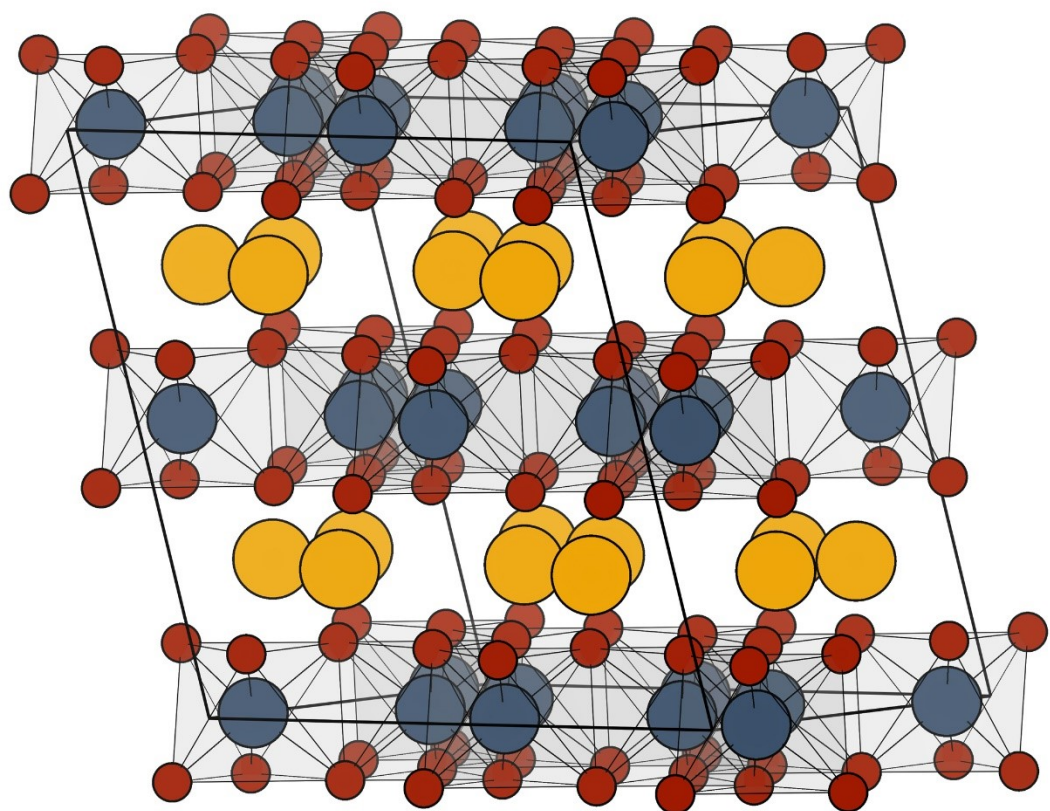

Fig S20 Calculated structure of  $\text{Li}_{16}(\text{Li-layer})\text{Li}_0(\text{Mn-layer})\text{Mn}_{16}\text{O}_{48}$

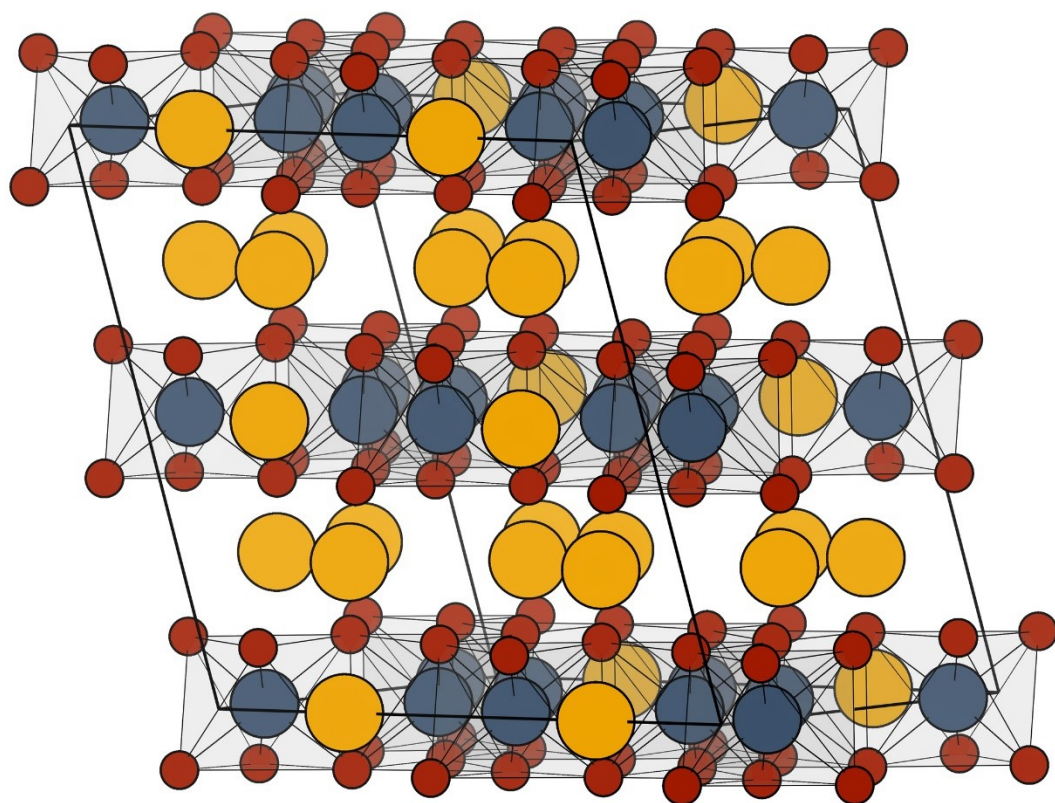

Fig S21 Calculated structure of  $\text{Li}_{16}(\text{Li-layer})\text{Li}_4(\text{Mn-layer})\text{Mn}_{16}\text{O}_{48}$

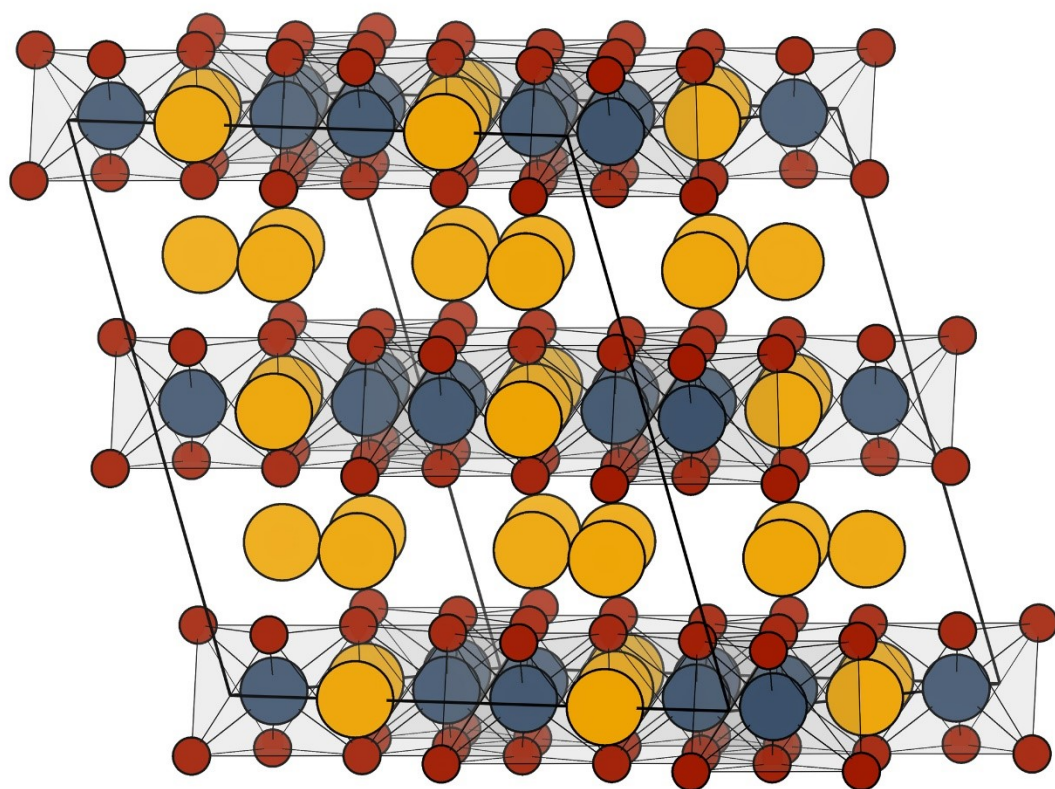

Fig S22 Calculated structure of  $\text{Li}_{16}(\text{Li-layer})\text{Li}_8(\text{Mn-layer})\text{Mn}_{16}\text{O}_{48}$



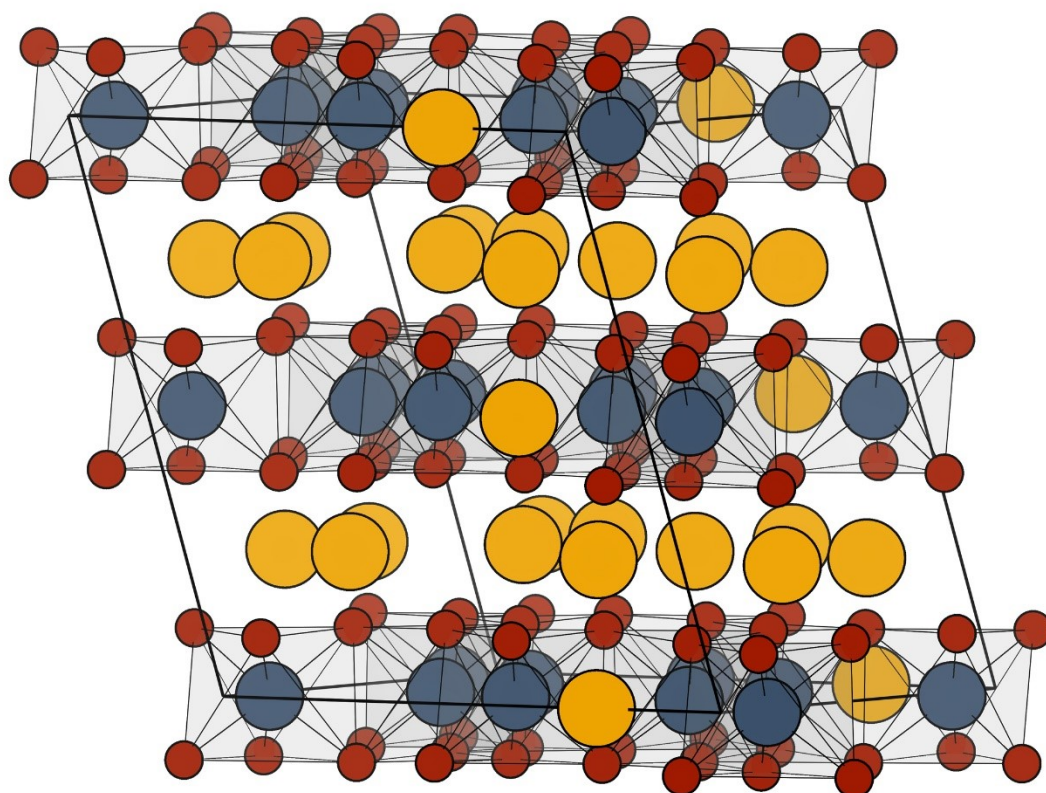

Fig S23 Calculated structure of  $\text{Li}_{18}(\text{Li-layer})\text{Li}_2(\text{Mn-layer})\text{Mn}_{16}\text{O}_{48}$

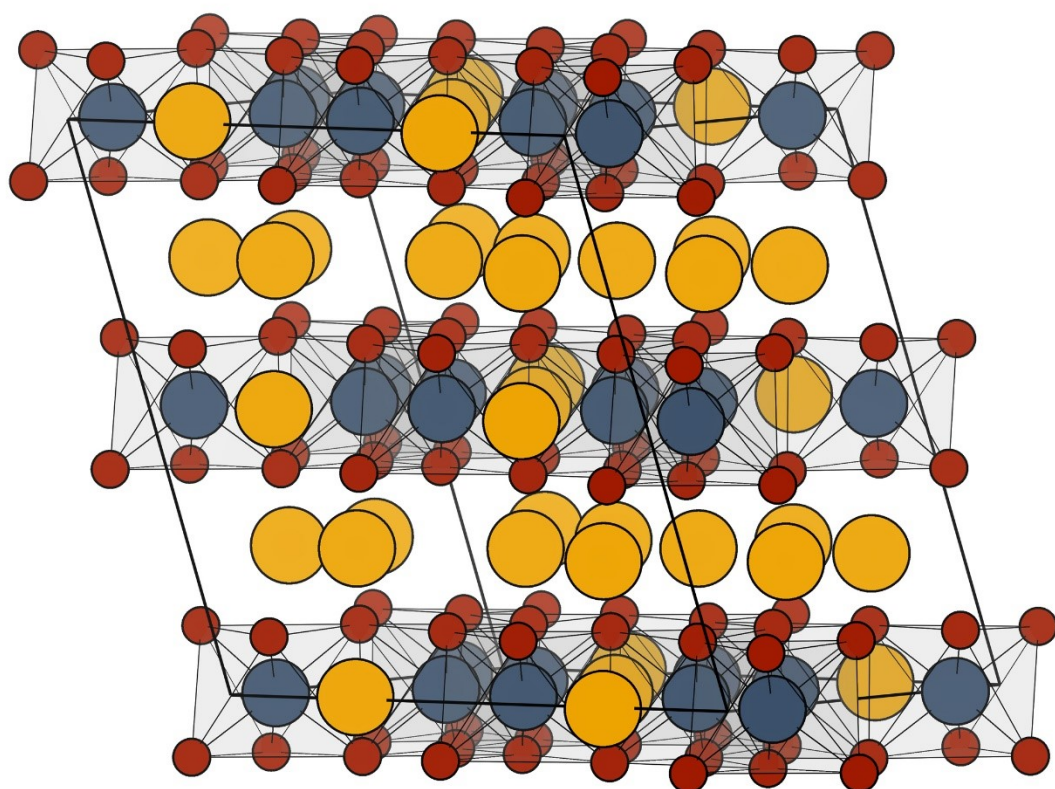

Fig S24 Calculated structure of  $\text{Li}_{18}(\text{Li-layer})\text{Li}_6(\text{Mn-layer})\text{Mn}_{16}\text{O}_{48}$

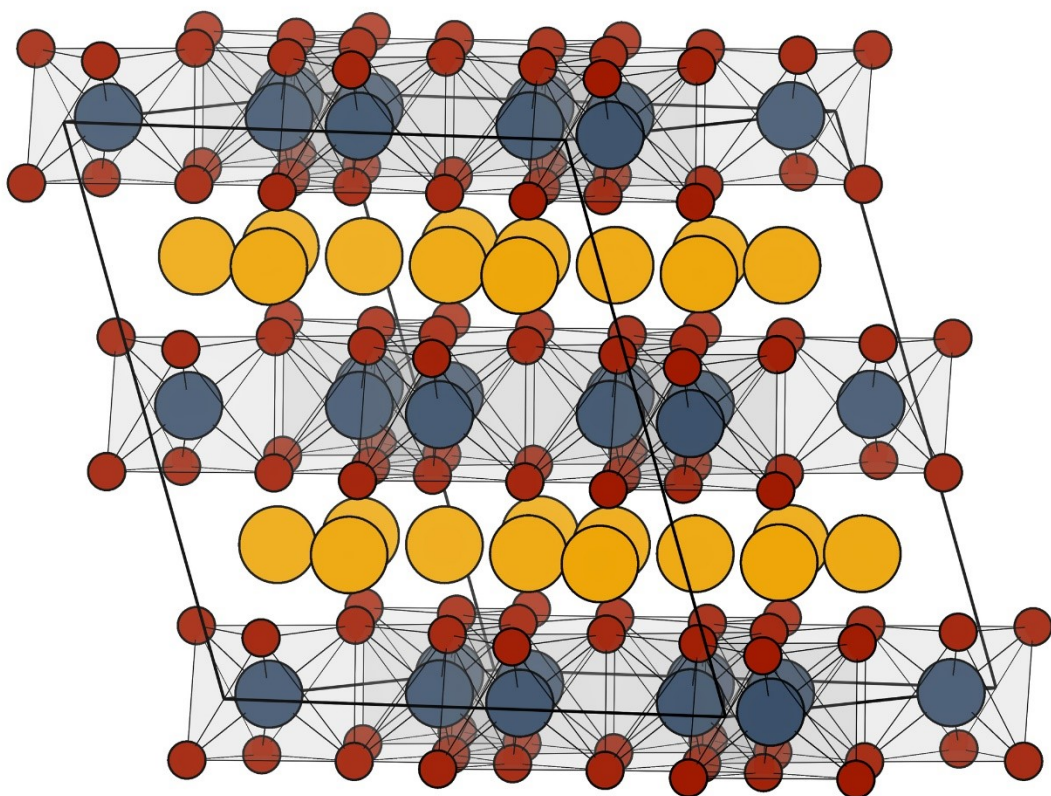

Fig S25 Calculated structure of  $\text{Li}_{20}(\text{Li-layer})\text{Li}_0(\text{Mn-layer})\text{Mn}_{16}\text{O}_{48}$



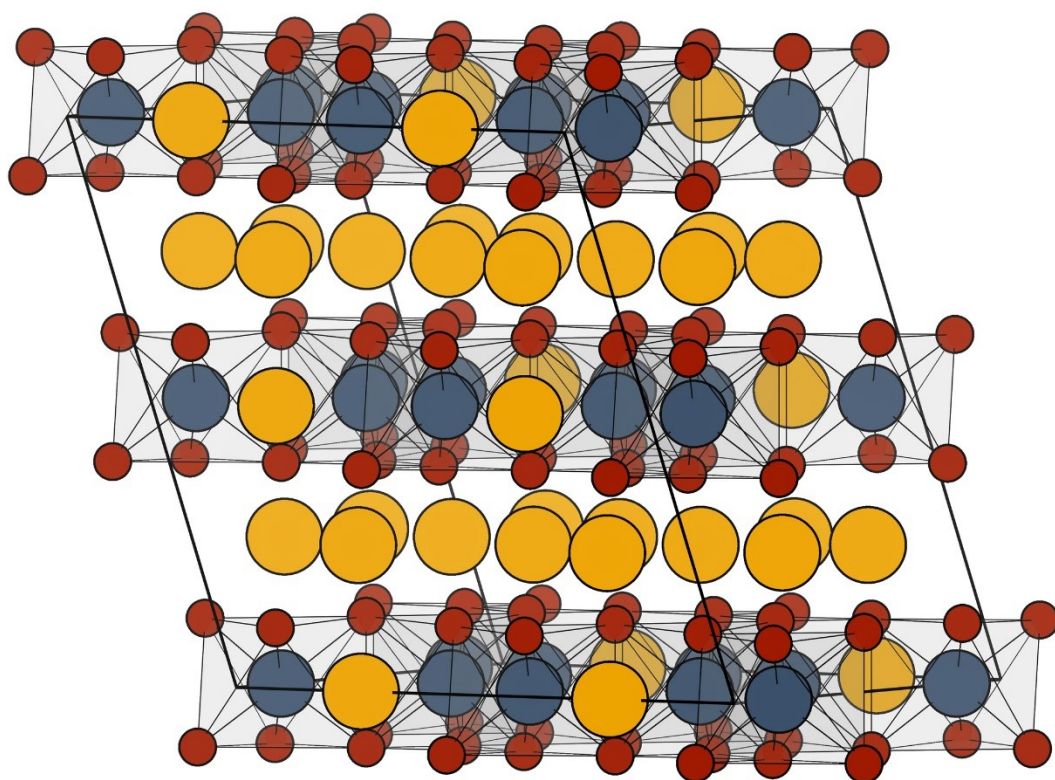

Fig S26 Calculated structure of  $\text{Li}_{20}(\text{Li-layer})\text{Li}_4(\text{Mn-layer})\text{Mn}_{16}\text{O}_{48}$

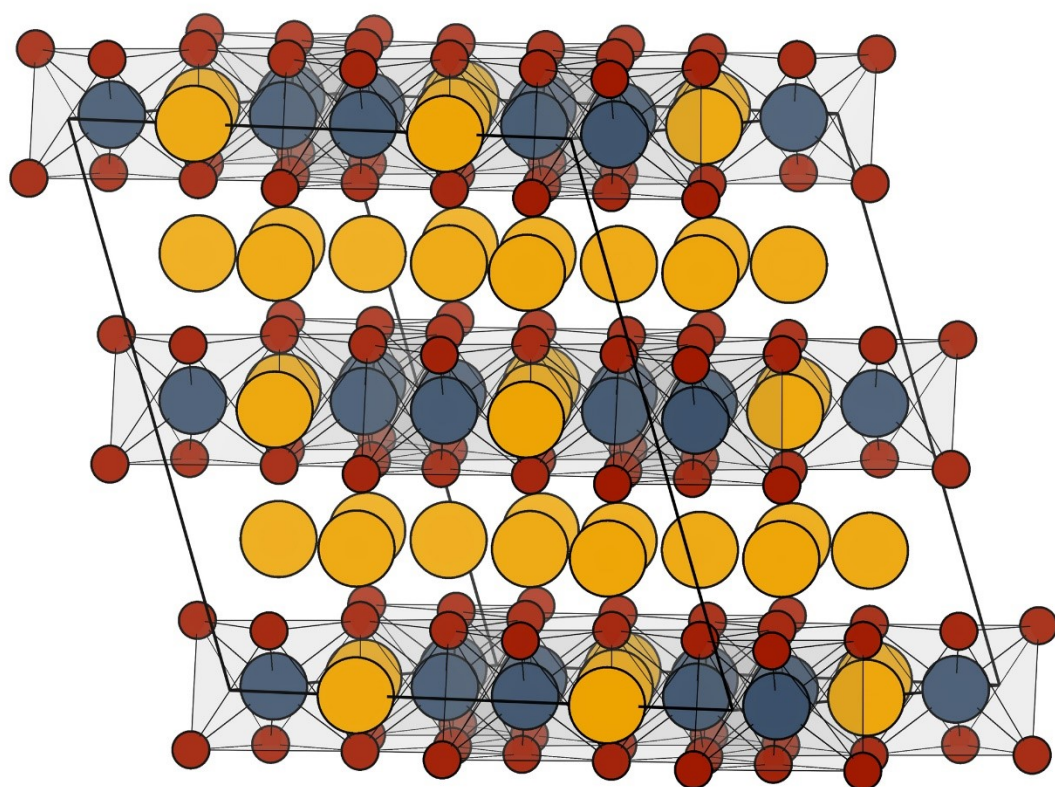

Fig S27 Calculated structure of  $\text{Li}_{20}(\text{Li-layer})\text{Li}_8(\text{Mn-layer})\text{Mn}_{16}\text{O}_{48}$

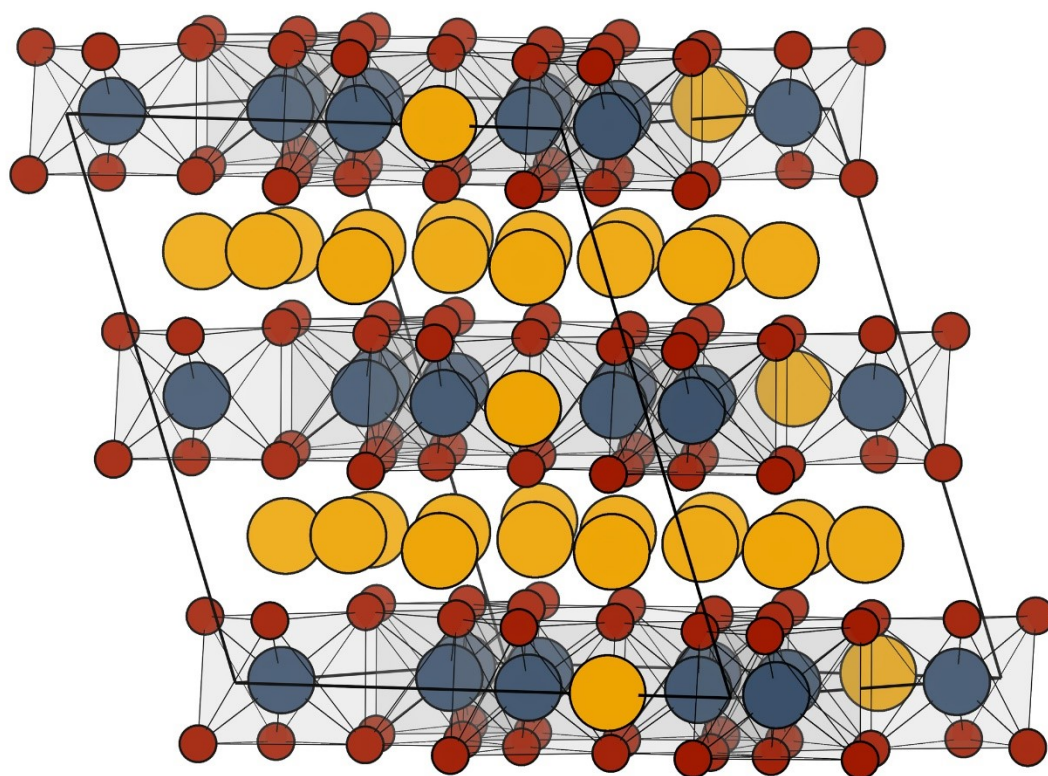

Fig S28 Calculated structure of  $\text{Li}_{22}(\text{Li-layer})\text{Li}_2(\text{Mn-layer})\text{Mn}_{16}\text{O}_{48}$

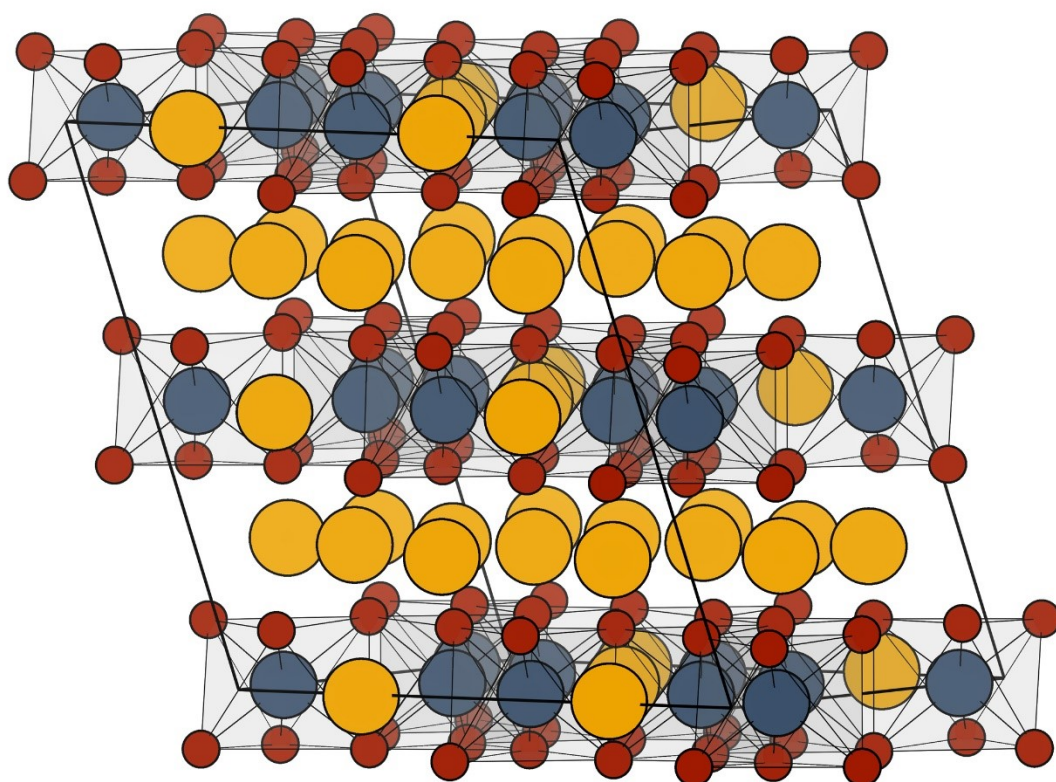

Fig S29 Calculated structure of  $\text{Li}_{22}(\text{Li-layer})\text{Li}_6(\text{Mn-layer})\text{Mn}_{16}\text{O}_{48}$



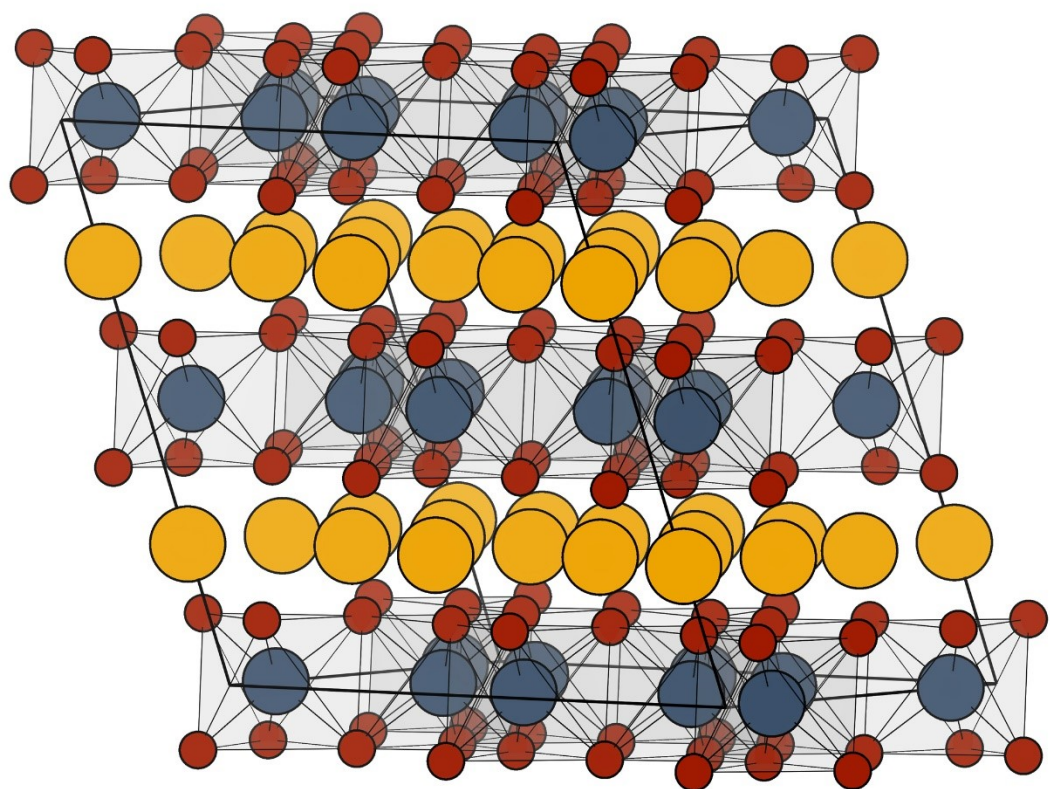

Fig S30 Calculated structure of  $\text{Li}_{24}(\text{Li-layer})\text{Li}_0(\text{Mn-layer})\text{Mn}_{16}\text{O}_{48}$

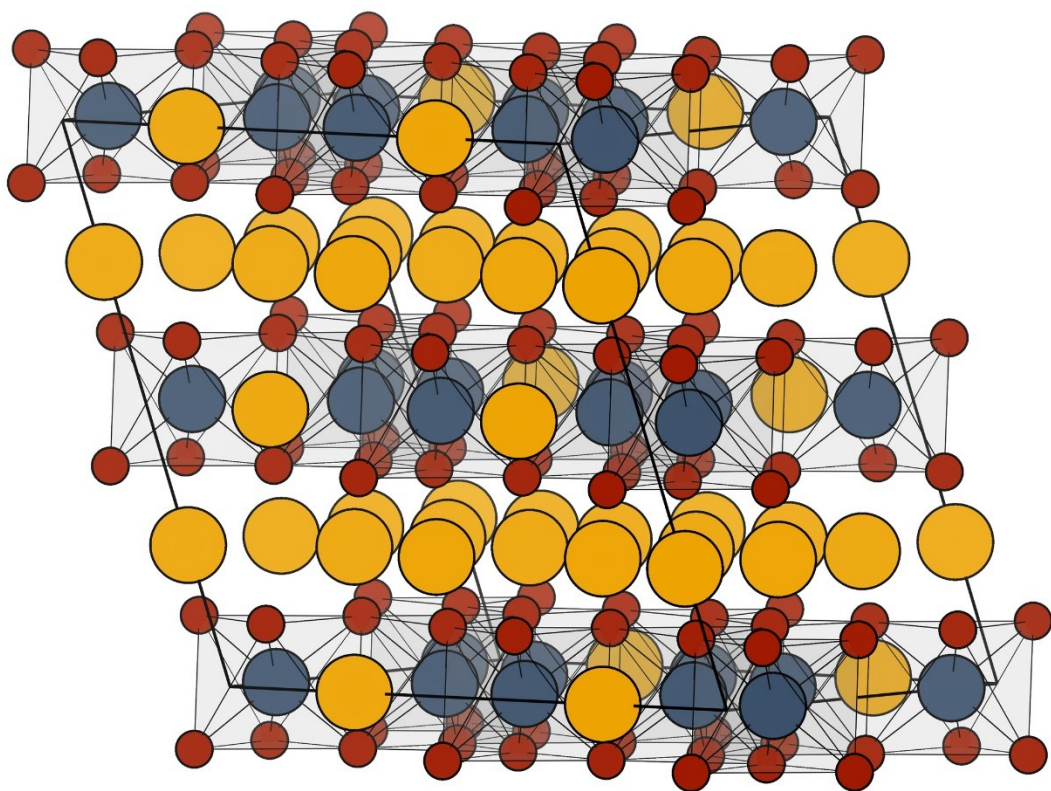

Fig S31 Calculated structure of  $\text{Li}_{24}(\text{Li-layer})\text{Li}_4(\text{Mn-layer})\text{Mn}_{16}\text{O}_{48}$

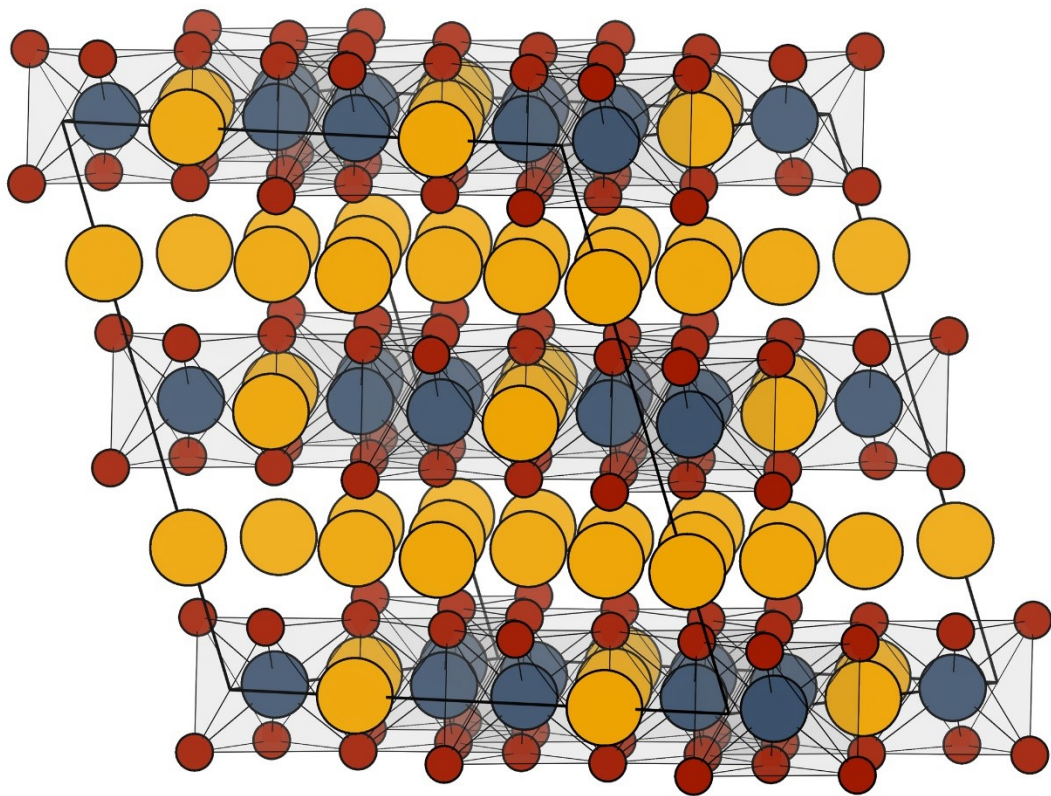

Fig S32 Calculated structure of  $\text{Li}_{24}(\text{Li-layer})\text{Li}_8(\text{Mn-layer})\text{Mn}_{16}\text{O}_{48}$
